# Supplementary material for: Wnt5a Deficiency Leads to Anomalies in Ureteric Tree Development, Tubular Epithelial Cell Organization and Basement Membrane Integrity Pointing to a Role in Kidney Collecting Duct Patterning
Source: PubMed Central journal article supplement (PMC4721645; doi:10.1371/journal.pone.0147171), 2016-01-21

S1 Fig

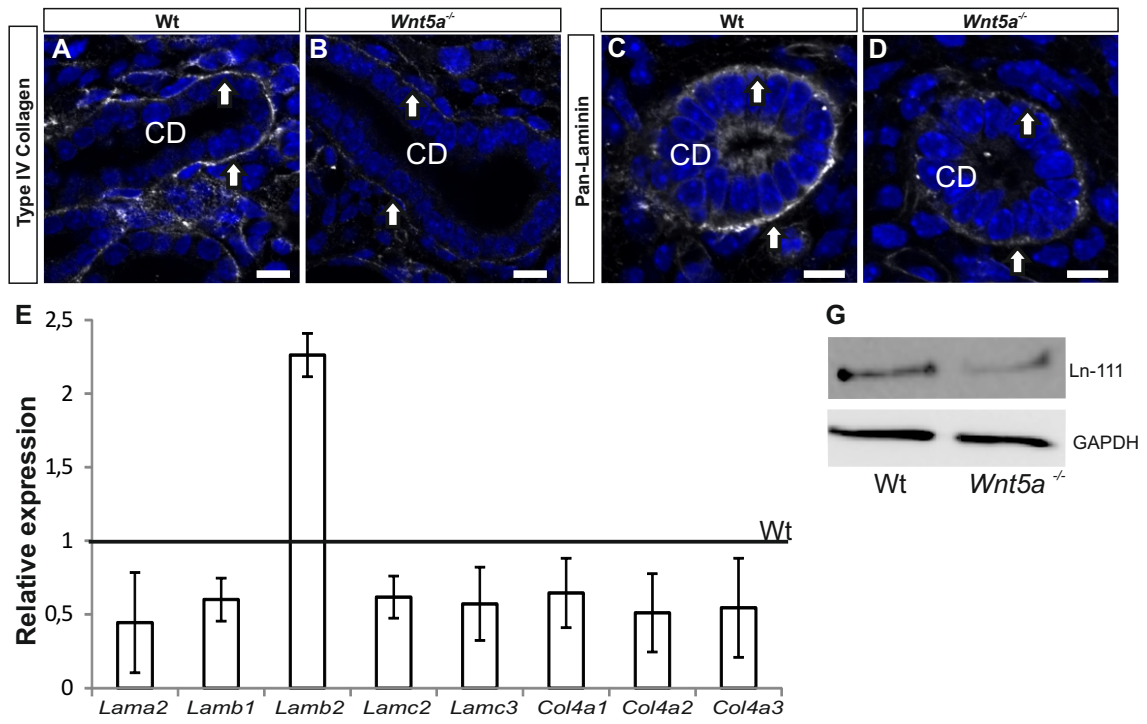

Supplement: pone.0147171.s001.pdf [file pone.0147171.s001.pdf]
