# Supplementary material for: Wnt5a Deficiency Leads to Anomalies in Ureteric Tree Development, Tubular Epithelial Cell Organization and Basement Membrane Integrity Pointing to a Role in Kidney Collecting Duct Patterning
Source: PubMed Central journal article supplement (PMC4721645; doi:10.1371/journal.pone.0147171), 2016-01-21
Supplement: pone.0147171.s002.pdf [file pone.0147171.s002.pdf]

# S2 Fig

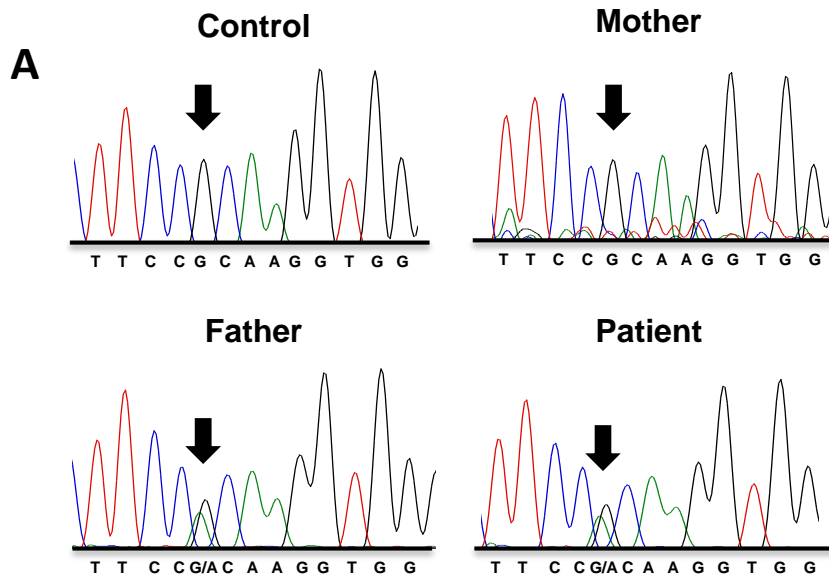

**B**

|                    |        |            |            |            |                     |            |           |
|--------------------|--------|------------|------------|------------|---------------------|------------|-----------|
| ENSP00000417310    | /1-380 | -TVYNLADVA | CKCHGVSGSC | SLKTCWLQLA | DFR <b>K</b> VGDALK | EKYDSAAAMR | human     |
| ENSGGOP0000007313  | /1-380 | -TVYNLADVA | CKCHGVSGSC | SLKTCWLQLA | DFR <b>K</b> VGDALK | EKYDSAAAMR | gorilla   |
| ENSSSCP00000020570 | /1-380 | -TVYNLADVA | CKCHGVSGSC | SLKTCWLQLA | DFR <b>K</b> VGDALK | EKYDSAAAMR | pig       |
| ENSRNOP00000021164 | /1-380 | -TVYNLADVA | CKCHGVSGSC | SLKTCWLQLA | DFR <b>K</b> VGDALK | EKYDSAAAMR | rat       |
| ENSMUSP00000064878 | /1-380 | -TVYNLADVA | CKCHGVSGSC | SLKTCWLQLA | DFR <b>K</b> VGDALK | EKYDSAAAMR | mouse     |
| ENSEEUP0000000699  | /1-380 | -TVYNLADVA | CKCHGVSGSC | SLKTCWLQLA | DFR <b>K</b> VGDALK | EKYDSAAAMR | hedgehog  |
| ENSCJAP00000014380 | /1-380 | -TVYNLADVA | CKCHGVSGSC | SLKTCWLQLA | DFR <b>K</b> VGDALK | EKYDSAAAMR | marmoset  |
| ENSOGAP00000006893 | /1-380 | -TVYNLADVA | CKCHGVSGSC | SLKTCWLQLA | DFR <b>K</b> VGDALK | EKYDSAAAMR | bush baby |
| ENSOANP0000002363  | /1-257 | -TVYNLADVA | CKCHGVSGSC | SLKTCWLQLA | DFR <b>K</b> VGDALK | EKYDSAAAMK | platypus  |
| ENSPMAP00000010868 | /1-373 | -AVYGLADVA | CKCHGVSGSC | SLKTCWLQLA | DFR <b>K</b> VGKFLK | EKYDSASAAR | lamprey   |
| ENSDARP00000018037 | /1-374 | -IVSDLADVS | CKCHGVSGSC | SLKTCWLQLA | DFR <b>K</b> VGDVLK | EKYDSAAAMR | zebrafish |
